# Supplementary material
Source: HighWire-hosted journal article supplement (https://ez-admanager.com/highwire/filestream/135282/field_highwire_adjunct_files/0/song_1308.pdf)
Supplement: song_1308.pdf [file song_1308.pdf]

# 심방세동이 있는 뇌졸중 환자에서 뇌 미세출혈과 사망률의 관계

## Association of cerebral microbleeds with mortality in stroke patients having atrial fibrillation

Tae-Jin Song, MD  
Jinkwon Kim, MD  
Dongbeom Song, MD  
Hyo Suk Nam, MD, PhD  
Young Dae Kim, MD,  
PhD  
Hye Sun Lee, MS  
Ji Hoe Heo, MD, PhD

**목적:** 비판막성 심방세동(nonvalvular atrial fibrillation, NVAF)이 있는 환자에서 뇌 미세출혈(cerebral microbleeds, CMBs)과 장기적인 사망률의 관계를 CMBs의 부하와 분포에 따라 조사하였다.

**방법:** 이 연구는 후향적 병원기반 관찰연구이다. 뇌 T2-강조, 경사회복에코(gradient-recalled echo) MRI를 시행한 총 504명의 NVAF가 있는 허혈뇌졸중 환자를 연속적으로 등록하였다. 사망 날짜와 원인에 대한 자료는 Korean National Statistical Office의 사망진단서에 근거를 두었다. CMBs의 존재여부, 부하, 분포와 모든 원인에 의한 사망, 허혈심장질환, 허혈뇌졸중, 그리고 출혈 뇌졸중의 관계를 평가하였다.

**결과:** CMBs는 30.7%의 환자에서 발견되었다(155/504). 평균 추적관찰 기간은 2.5년이었고, 176명(34.9%)이 사망하였다(허혈뇌졸중, 81; 출혈뇌졸중, 12; 허혈심장질환, 32). CMBs가 있는 환자는 CMBs가 없는 환자보다 더 많이 사망하였다(41.9% vs 3.8%,  $P=0.028$ ). 나이, 성별, 그리고 다른 유의한 변수에 대해 보정한 후, 다발성 CMBs ( $\geq 5$ )의 존재는 모든 원인에 의한 사망(위험도 [hazard ratio, HR]: 1.99)과 허혈뇌졸중(HR: 3.39)으로 인한 사망에 대한 독립적인 예측인자였다. CMBs가 뇌엽에 국한된 환자는 출혈뇌졸중으로 인한 사망률의 위험도 역시 증가하였다(HR: 5.91).

**결론:** CMBs의 존재와 부하는 NVAF가 있는 뇌졸중 환자에서 사망률의 증가와 관계가 있다. 엽상 CMBs가 있는 환자는 출혈 뇌졸중으로 인한 사망률의 위험도가 증가하였다. CMBs의 진단은 NVAF가 있는 뇌졸중 환자의 장기적인 예후를 예측하는 가치가 있다.

Neurology® 2014;83:1308–1315

Figure 1 Kaplan-Meier survival plots for acute ischemic stroke patients with nonvalvular atrial fibrillation against CMB burden

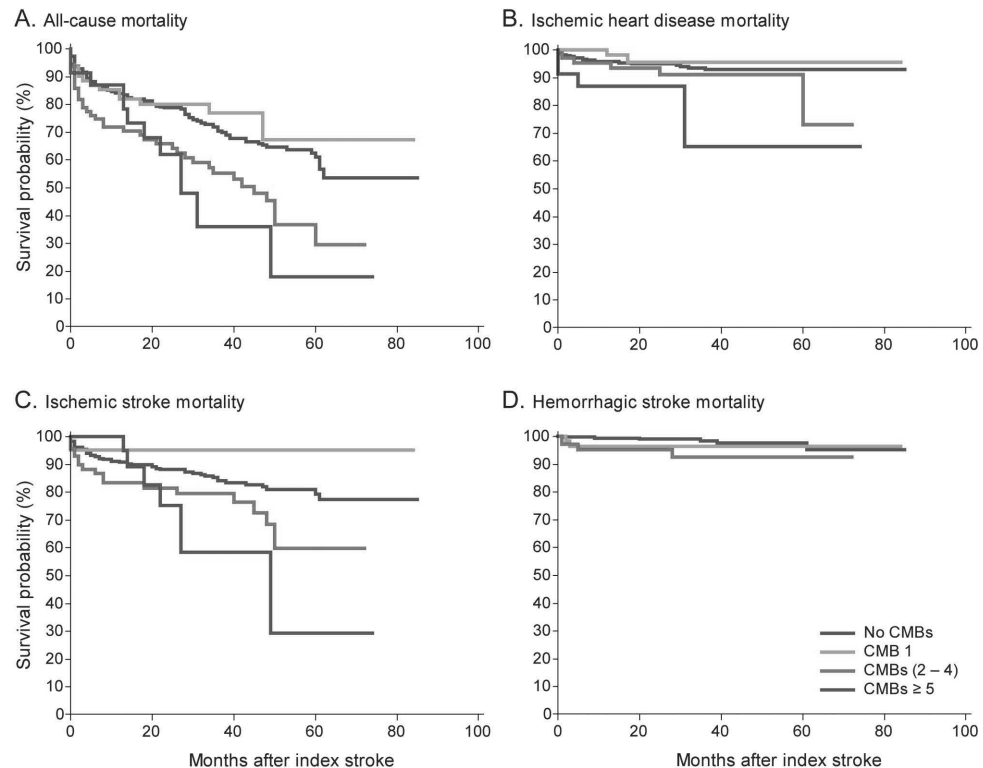

Kaplan-Meier curve shows that the occurrence of all-cause (A) ( $p = 0.001$ ), ischemic heart disease (B) ( $p = 0.043$ ), and ischemic stroke (C) ( $p = 0.001$ ) mortalities depend on burden of cerebral microbleeds (CMBs), but hemorrhagic stroke (D) mortality does not ( $p = 0.140$ ).
